# Supplementary material for: A 3D-printed stretchable structural supercapacitor with active stretchability/flexibility and remarkable volumetric capacitance
Source: Royal Society of Chemistry journal article supplement (doi:10.1039/d0ta04460a), 2020-01-01
Supplement: d0ta04460a2.pdf [file d0ta04460a2.pdf]

## Supplementary Information

### 3D-Printed Stretchable Structural Supercapacitor with Active Stretchability/Flexibility and Remarkable Volumetric Capacitance

Peng Chang, Hui Mei\*, Yuanfu Tan, Yu Zhao, Weizhao Huang, Laifei Cheng

*Science and Technology on Thermostructural Composite Materials Laboratory, School of Materials Science and Engineering, Northwestern Polytechnical University, Xi'an 710072, China.*

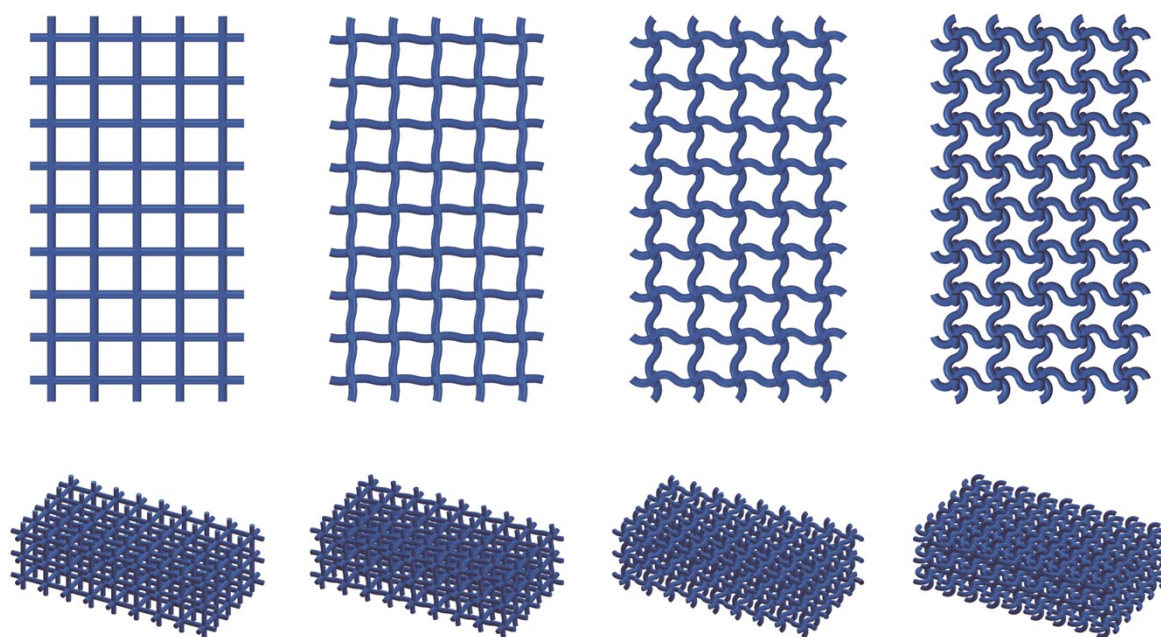

**Fig. S1.** Negative Poisson's ratio structures with different concave angles (From left to right: 0°, 30°, 90°, and 150°).

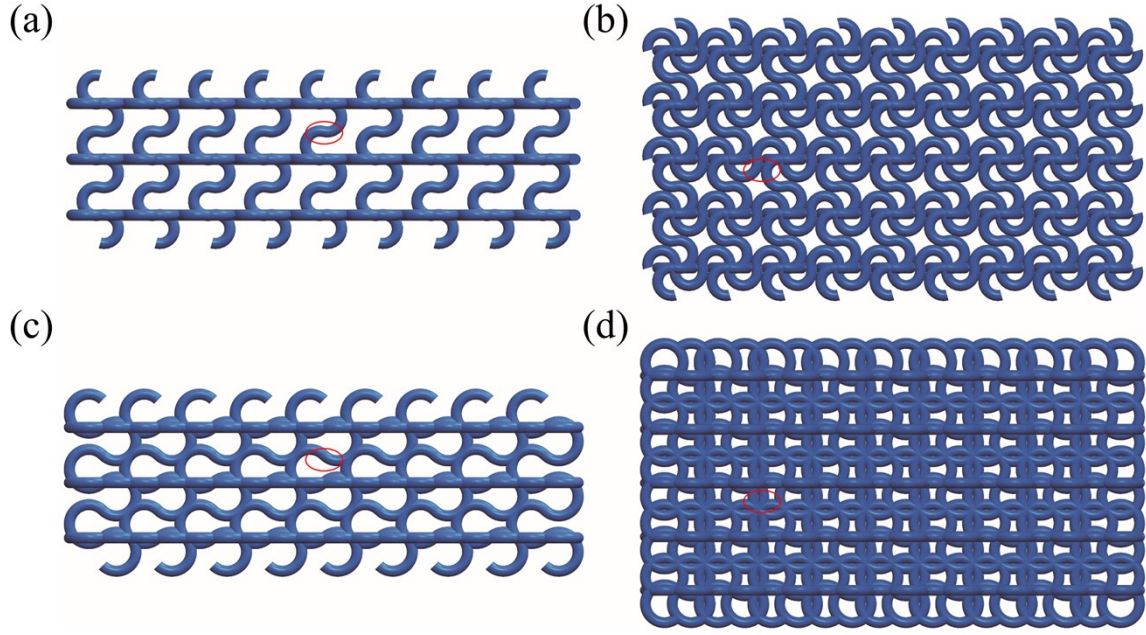

**Fig. S2.** Side view (a, c) and top view (b, d) of Negative Poisson's ratio structures with concave angles of  $210^\circ$  (up) and  $270^\circ$  (down).

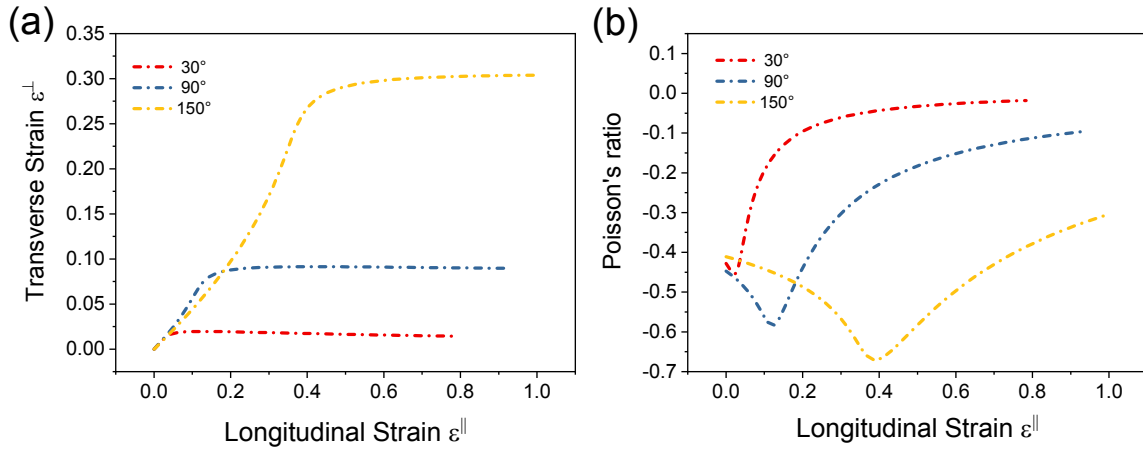

**Fig. S3.** Longitudinal strain vs transverse strain (a) and Poisson's ratio (b) of Negative Poisson's ratio structures with concave angles of  $30^\circ$ ,  $90^\circ$  and  $150^\circ$ .

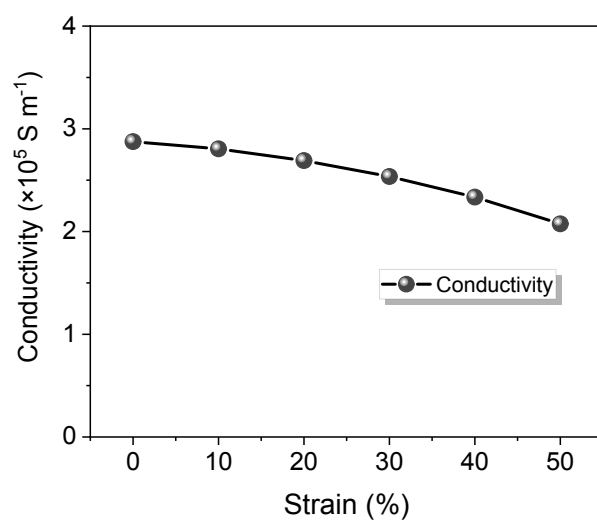

**Fig. S4.** Conductivity of  $\text{CoNi}_2\text{S}_4/\text{NiCo-LDHs}/\text{Ni}/\text{PL-150}^\circ$  under different tensile strains.

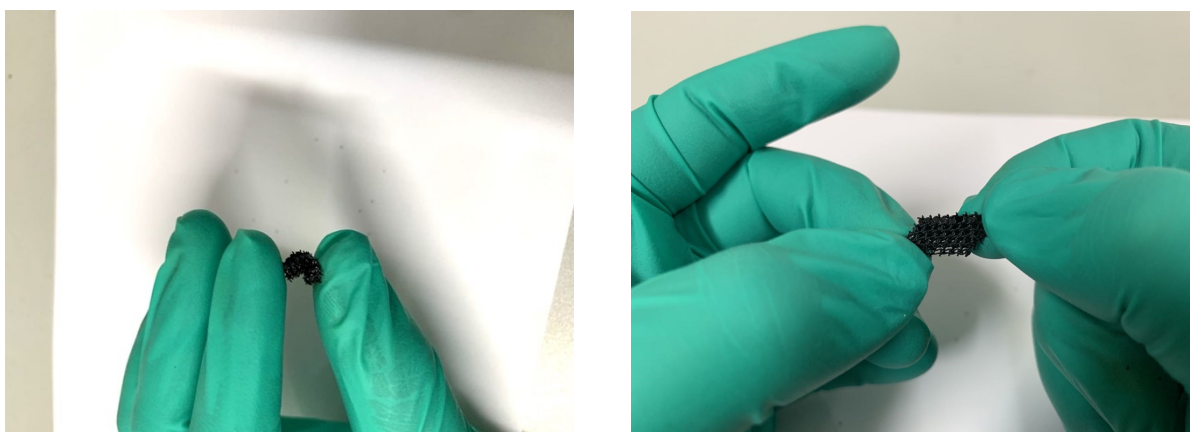

**Fig. S5.** The photographs of electrodes during the stretching/bending process

To analyze the deformation of the designed structures during the stretching process, we conducted finite element simulation by using the Comsol Multiphasics. We used the viscoelastic model to capture the mechanical behavior of cured photosensitive resin. The generalized Maxwell model was used and the applied strain rate was  $0.02 \text{ mm s}^{-1}$ . Without considering the thermal effect, the density, modulus and Poisson's ratio of the cured photosensitive resin were  $1.3 \text{ g cm}^{-3}$ ,  $2580 \text{ MPa}$  and  $0.35$ , respectively (at room temperature). The simulation result was shown in Movie. S1.

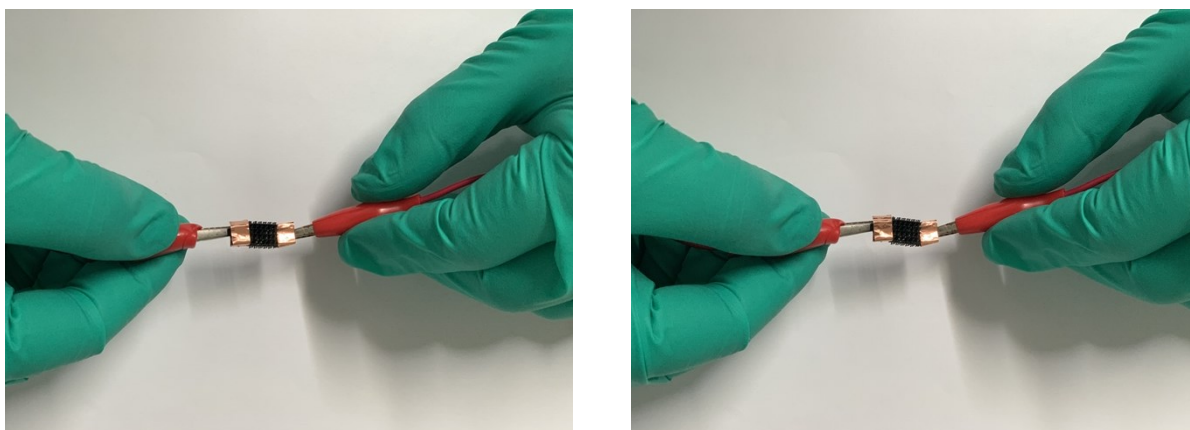

Fig. S6. The photographs of the assembled symmetric supercapacitor.

**Table S1** Atomic and mass concentration of the elements in  $\text{CoNi}_2\text{S}_4/\text{NiCo-LDHs}$ .

| Atomic Concentration % |       |       |       |      | Mass Concentration % |       |       |       |      |
|------------------------|-------|-------|-------|------|----------------------|-------|-------|-------|------|
| Ni 2p                  | Co 2p | O 1s  | C 1s  | S 2p | Ni 2p                | Co 2p | O 1s  | C 1s  | S 2p |
| 7.94                   | 9.68  | 37.71 | 39.54 | 5.12 | 20.45                | 25.04 | 26.47 | 20.83 | 7.2  |

**Table S2** Comparison of the 3D-printed stretchable structural  $\text{CoNi}_2\text{S}_4/\text{NiCo-LDHs}/\text{Ni}/\text{PL}$  nanocomposite electrodes with recently reported 3D electrodes in terms of volumetric capacitance, rate capability and stability.

| Electrode Materials                                                              | Volumetric Capacitance                               | Rate Capability                    | Stability                | Ref.             |
|----------------------------------------------------------------------------------|------------------------------------------------------|------------------------------------|--------------------------|------------------|
| <b>PPy-PVA hydrogel</b>                                                          | 13.06 F $\text{cm}^{-3}$ at 5 mA $\text{cm}^{-3}$    | 15.8% at 50 mA $\text{cm}^{-3}$    | 86.3% after 10000 cycles | 43               |
| <b>AC/CNT/rGO</b>                                                                | 41.3 F $\text{cm}^{-3}$ at 10 mV $\text{s}^{-1}$     | 72% at 100 mV $\text{s}^{-1}$      | 93.3% after 5000 cycles  | 41               |
| <b><math>\text{CoNi}_2\text{S}_4/\text{Ni}</math></b>                            | 3.17 F $\text{cm}^{-3}$ at 10 mA $\text{cm}^{-3}$    | 68.5% at 50 mA $\text{cm}^{-3}$    | 77.3% after 2000 cycles  | 24               |
| <b>PANI/rGO</b>                                                                  | 12.5 F $\text{cm}^{-3}$ at 4.2 mA $\text{cm}^{-2}$   | ~50% at 50 mA $\text{cm}^{-2}$     | 75% after 10000 cycles   | 37               |
| <b>Black-Phosphorus/CNT</b>                                                      | 41.1 F $\text{cm}^{-3}$ at 5 mV $\text{s}^{-1}$      | 83.7% at 10 mV $\text{s}^{-1}$     | 91.5% after 10000 cycles | 42               |
| <b><math>\text{ZnCO@Ni(OH)}_2</math></b>                                         | 94.67 F $\text{cm}^{-3}$ at 3 mA $\text{cm}^{-2}$    | 74% at 15 mA $\text{cm}^{-2}$      | 90.3% after 10000 cycles | 38               |
| <b>NWAs/CNTF</b>                                                                 |                                                      |                                    |                          |                  |
| <b><math>\text{MnO}_2/\text{MGF}/\text{NF}</math></b>                            | 14.28 F $\text{cm}^{-3}$ at 0.64 mA $\text{cm}^{-2}$ | 66.1% at 10.24 mA $\text{cm}^{-2}$ | ~100% after 5000 cycles  | 39               |
| <b><math>\text{Cu(OH)}_2/\text{Cu}/\text{Ceramic}</math></b>                     | 8.46 F $\text{cm}^{-3}$ at 5 mA $\text{cm}^{-3}$     | 68.1% at 1 A $\text{cm}^{-3}$      | 84.3% after 10000 cycles | 17               |
| <b>rGO/CNT</b>                                                                   | 2 F $\text{cm}^{-3}$ at 0.1 mA $\text{cm}^{-2}$      | 84% at 1 mA $\text{cm}^{-2}$       | 90% after 100000 cycles  | 40               |
| <b><math>\text{CoNi}_2\text{S}_4/\text{NiCo-LDHs}/\text{Ni}/\text{PL}</math></b> | 46.2 F $\text{cm}^{-3}$ at 10 mA $\text{cm}^{-3}$    | 76.8% at 500 mA $\text{cm}^{-3}$   | 92.2 after 5000 cycles   | <b>This work</b> |

**Table S3** Comparison of the 3D-printed stretchable structural  $\text{CoNi}_2\text{S}_4/\text{NiCo-LDHs}/\text{Ni}/\text{PL}$  supercapacitor with state-of-the-art flexible supercapacitors in terms of capacitance retention after stretching/bending cycles.

| <b>Electrode Materials</b>                                | <b>Capacitance Retention<br/>After Bending Cycles</b> | <b>Capacitance Retention<br/>After Stretching Cycles</b> | <b>Ref.</b>          |
|-----------------------------------------------------------|-------------------------------------------------------|----------------------------------------------------------|----------------------|
| <b>PPy-PVA hydrogel</b>                                   | 97.9% after 10000 cycles                              | \                                                        | 43                   |
| <b>PPy/BPO-CNT</b>                                        | \                                                     | 95% after 10000 cycles                                   | 9                    |
| <b>CNT-MnO<sub>2</sub></b>                                | 80.8 % after 1800 cycles                              | \                                                        | 13                   |
| <b>PANI/RGO</b>                                           | \                                                     | ~105% of after 500 cycles                                | 10                   |
| <b>Ni<sub>3</sub>S<sub>2</sub>-Ni wire</b>                | 96% after 50 cycles                                   | \                                                        | 54                   |
| <b>MXene-AgNW-<br/>MnONW-C60 gel</b>                      | \                                                     | 75% after 1000 cycles                                    | 8                    |
| <b>ZNCO@Ni(OH)<sub>2</sub><br/>NWAs/CNTF</b>              | 93.6% after 3000 cycles                               | \                                                        | 38                   |
| <b>Graphene/Nanotube<br/>/PANI</b>                        | \                                                     | 93% after 100 cycles                                     | 7                    |
| <b>SE/rGO/Ag-<br/>NWs/rGO/ SE</b>                         | 97% after 4000 cycles                                 | 99% after 1000 cycles                                    | 14                   |
| <b>CoNi<sub>2</sub>S<sub>4</sub>/NiCo-<br/>LDHs/Ni/PL</b> | 75.2% after 1000 cycles                               | 88.1% after 2000 cycles                                  | <b>This<br/>work</b> |

**Table S4** Statistical results in tensile strength, modulus, energy absorption, and designed surface area of four types of electrodes.

| Sample | Tensile<br>Strength<br>(MPa) | Modulus<br>(MPa) | Energy Absorption<br>(kJ m <sup>-3</sup> ) | Designed Surface<br>Area (cm <sup>2</sup> ) |
|--------|------------------------------|------------------|--------------------------------------------|---------------------------------------------|
| 0°     | 1.77 ± 0.18                  | 15.92 ± 1.21     | 133.62 ± 17.88                             | 6.82                                        |
| 30°    | 1.86 ± 0.11                  | 10.95 ± 1.64     | 349.52 ± 29.40                             | 8.74                                        |
| 90°    | 2.07 ± 0.15                  | 8.56 ± 1.57      | 505.21 ± 39.55                             | 9.50                                        |
| 150°   | 2.21 ± 0.23                  | 6.88 ± 0.75      | 817.73 ± 58.91                             | 11.39                                       |
